# Supplementary material for: Fundamental and technological aspects of thermochemical expansion of proton-conducting oxides: a case study of BaSn1−xScxO3−δ
Source: Royal Society of Chemistry journal article supplement (doi:10.1039/d4ta02402h), 2024-01-01
Supplement: d4ta02402h1.pdf [file d4ta02402h1.pdf]

## Supplementary information

### Fundamental and technological aspects of thermochemical expansion of proton-conducting oxides: a case study of $\text{BaSn}_{1-x}\text{Sc}_x\text{O}_{3-\delta}$

G.N. Starostin,<sup>a,b</sup> D.S. Tsvetkov,<sup>a\*</sup> I.A. Starostina,<sup>a,b</sup> V.V. Sereda,<sup>a</sup>  
M.T. Akopian,<sup>a,b</sup> D.A. Malyshkin,<sup>a</sup> I.L. Ivanov,<sup>a</sup> A.A. Murashkina,<sup>c</sup>  
A.Yu. Zuev,<sup>a</sup> D.A. Medvedev<sup>a,b\*</sup>

<sup>a</sup> Ural Federal University, 620002 Ekaterinburg, Russian Federation

<sup>b</sup> Institute of High Temperature Electrochemistry, 620066 Ekaterinburg, Russian Federation

<sup>c</sup> Saint-Petersburg State University, 198504 Saint-Petersburg, Russian Federation

Corresponding authors:

Dmitry Tsvetkov (dmitry.tsvetkov@urfu.ru), Dmitry Medvedev (dmitrymedv@mail.ru).

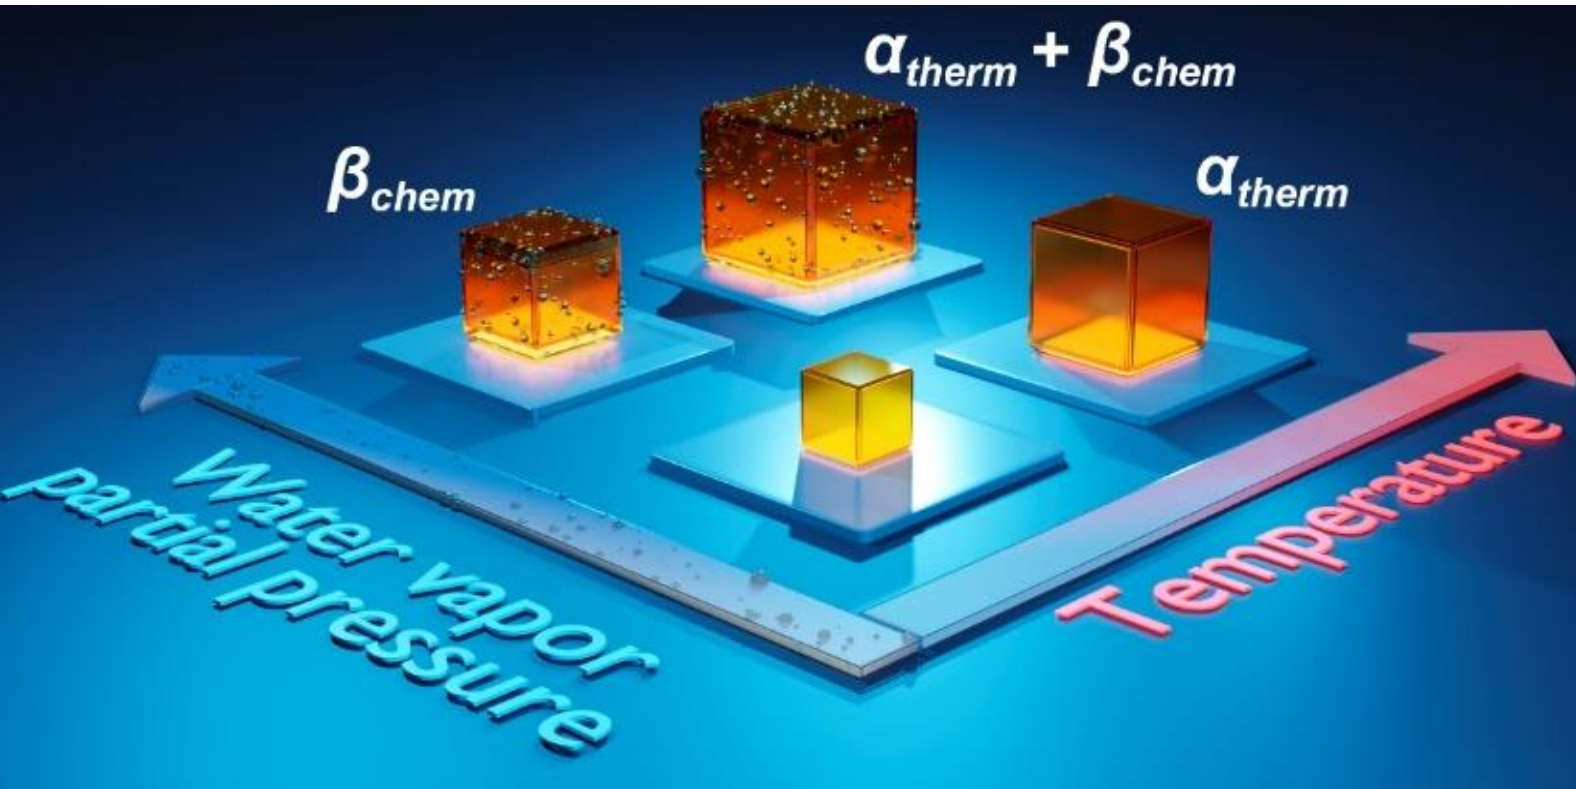

This file includes:

3 Figures

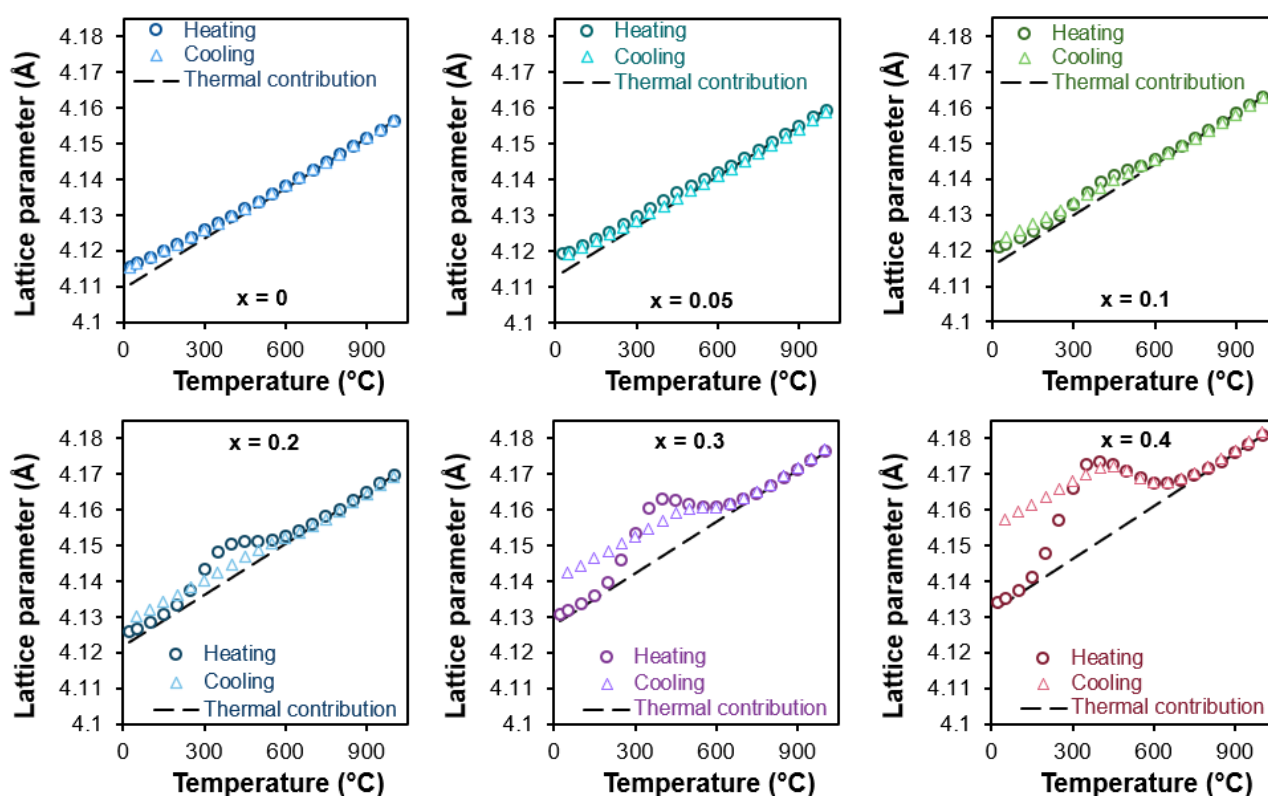

**Figure S1.** Variation in lattice parameter of barium stannate materials ( $\text{BaSn}_{1-x}\text{Sc}_x\text{O}_{3-\delta}$ ) in heating and cooling modes, as well as the linear part of the curve extrapolated from the high-temperature region relating the thermal contribution to the overall evolution of the lattice parameter from temperature.

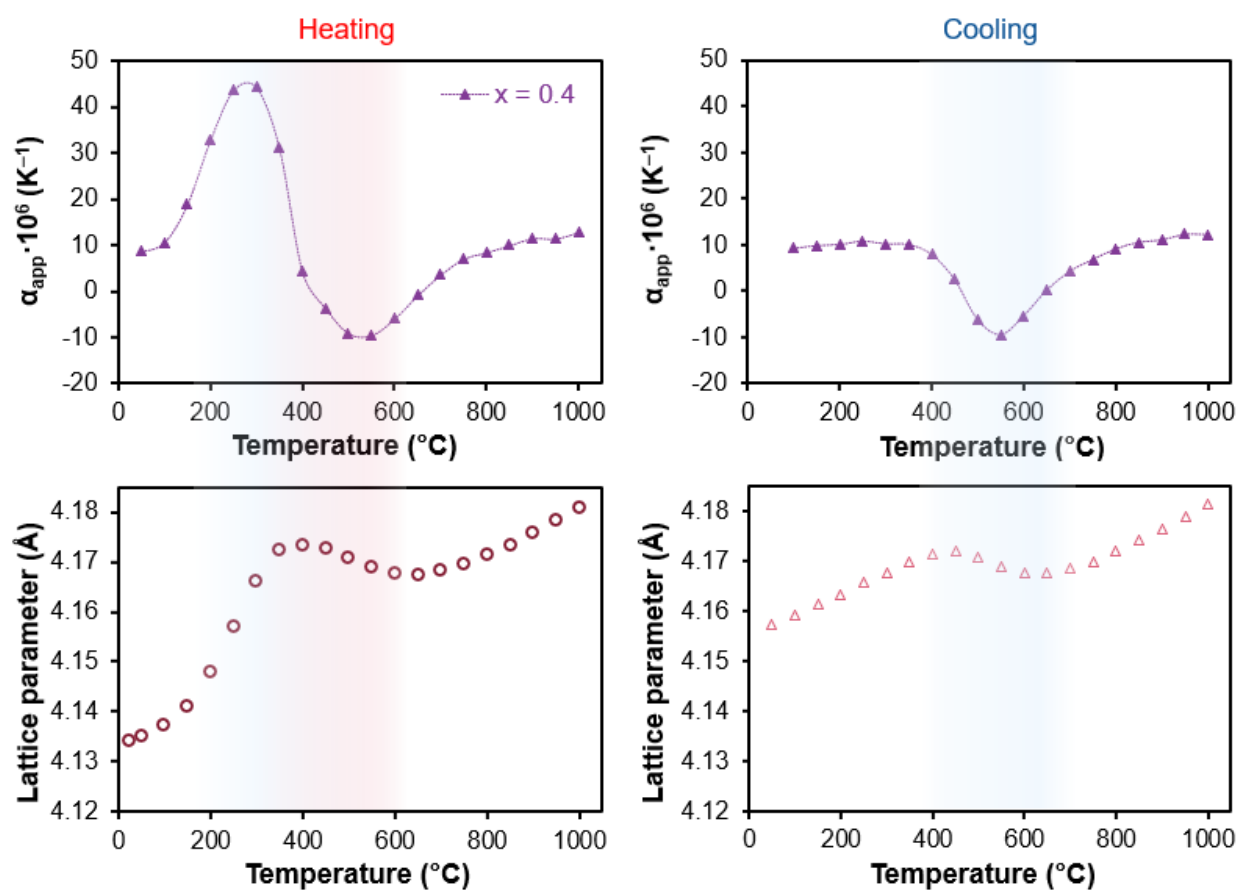

**Figure S2.** HT-XRD data for BaSn<sub>0.6</sub>Sc<sub>0.4</sub>O<sub>3-δ</sub> material: correlation between the apparent TEC variation and the evolution of the lattice parameter in both heating and cooling modes.

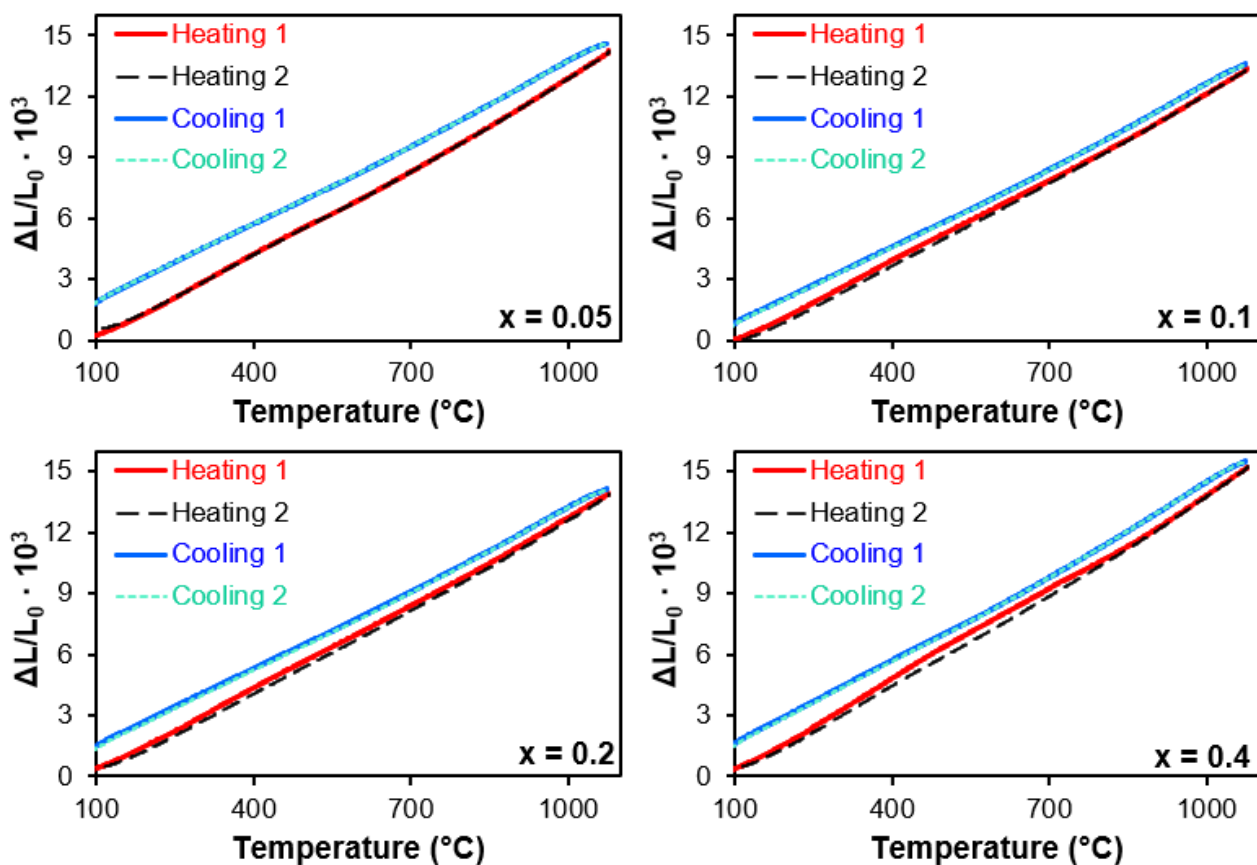

**Figure S3.** Dilatometric dependences for  $\text{BaSn}_{1-x}\text{Sc}_x\text{O}_{3-\delta}$  ceramic materials obtained in two heating and cooling cycles.

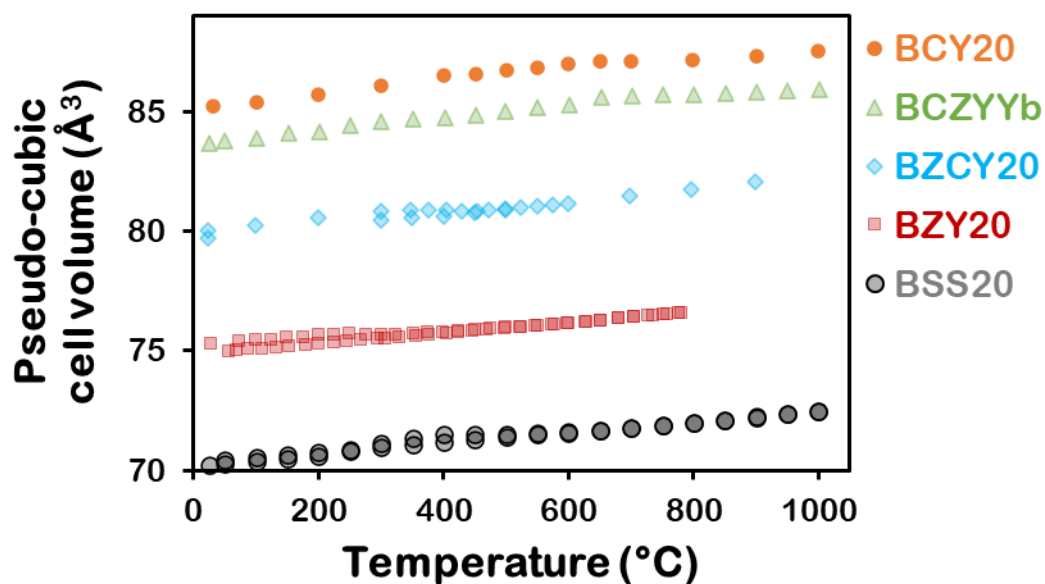

**Figure S4.** Temperature dependences of pseudo-cubic cell volume for  $\text{BaSn}_{0.8}\text{Sc}_{0.2}\text{O}_{3-\delta}$  and the state-of-the-art proton-conducting electrolytes with the same acceptor dopant amount: BCY20 ( $\text{BaCe}_{0.8}\text{Y}_{0.2}\text{O}_{3-\delta}$ ),<sup>S1</sup> BCZYYb ( $\text{BaCe}_{0.7}\text{Zr}_{0.1}\text{Y}_{0.1}\text{Yb}_{0.1}\text{O}_{3-\delta}$ ),<sup>S2</sup> BZCY20 ( $\text{BaZr}_{0.4}\text{Ce}_{0.4}\text{Y}_{0.2}\text{O}_{3-\delta}$ ),<sup>S3</sup> BZY20 ( $\text{BaZr}_{0.8}\text{Y}_{0.2}\text{O}_{3-\delta}$ ).<sup>S4</sup>

## References

[S1] D. Han, M. Majima, T. Uda, *J. Solid State Chem.*, 2013, **205**, 122.

<https://doi.org/10.1016/j.jssc.2013.07.010>

[S2] Y. Zhang, D. Xie, B. Chi, J. Pu, J. Li, D. Yan, *Asia-Pac. J. Chem. Eng.*, 2019, **14**, e2322.

<https://doi.org/10.1002/apj.2322>

[S3] J. F. Basbus, M. D. Arce, F. D. Prado, A. Caneiro, L.V. Mogni, *J. Power Sources*, 2016, **329**, 262.

<https://doi.org/10.1016/j.jpowsour.2016.08.083>

[S4] A. K. E. Andersson, S. M. Selbach, C. S. Knee, T. Grande, *J. Am. Ceram. Soc.*, 2014, **97**, 2654.

<https://doi.org/10.1111/jace.12990>
